1 **Gut microbiome communication with bone marrow regulates susceptibility to amebiasis.**

2 **One Sentence Summary:** Introduction of the human commensal bacteria *Clostridium scindens*  
3 into the intestinal microbiota epigenetically alters bone marrow and protects from future parasite  
4 infection.

5 **Authors:** Stacey L. Burgess<sup>1</sup>, Jhansi L. Leslie<sup>1</sup>, Md. Jashim Uddin<sup>1</sup>, Noah Oakland<sup>1</sup>, Carol  
6 Gilchrist<sup>1</sup>, G.Brett Moreau<sup>1</sup>, Koji Watanabe<sup>1,2</sup>, Mahmoud Saleh<sup>1</sup>, Morgan Simpson<sup>1</sup>, Brandon A.  
7 Thompson<sup>1</sup>, David T. Auble<sup>3</sup>, Stephen D. Turner<sup>4</sup>, Natasa Giallourou<sup>5</sup>, Jonathan Swann<sup>5</sup>, Zhen  
8 Pu<sup>6</sup>, Jennie Z. Ma<sup>6</sup>, Rashidul Haque<sup>7</sup>, William A. Petri, Jr.\*<sup>1</sup>

9 **Affiliations:**

10 1. Division of Infectious Diseases and International Health, Department of Medicine, University  
11 of Virginia, Charlottesville, Virginia, USA

12  
13 2. AIDS Clinical Center, National Center for Global Health and Medicine, Shinjuku, Tokyo,  
14 Japan

15  
16 3. Department of Biochemistry and Molecular Genetics, University of Virginia, Charlottesville,  
17 Virginia, USA.

18  
19 4. Department of Public Health Sciences, University of Virginia School of Medicine,  
20 Charlottesville, Virginia, USA

21  
22 5. Division of Integrative Systems Medicine and Digestive Diseases, Imperial College London,  
23 United Kingdom

24  
25 6. Department of Statistics and Department of Public Health Sciences, University of Virginia,  
26 Charlottesville, Virginia, USA

27  
28 7. International Centre for Diarrhoeal Diseases Research, Dhaka, Bangladesh

29 **\*Correspondence to:**

30 William A. Petri, Jr.

31 University of Virginia Division of Infectious Diseases and International Health

32 PO Box 801340

33 Charlottesville VA 22908-1340

34 434/924-5621

35 wap3g@virginia.edu

36

37 **Abstract:**

38 The gut microbiome provides resistance to infection. However, the mechanisms for this are  
39 poorly understood. Colonization with the intestinal bacterium *Clostridium scindens* provided  
40 protection from the parasite *Entamoeba histolytica* via innate immunity. Introduction of *C.*  
41 *scindens* into the gut microbiota epigenetically altered and expanded bone marrow granulocyte-  
42 monocyte-progenitors (GMPs) and provided neutrophil-mediated protection against subsequent  
43 challenge with *E. histolytica*. Adoptive transfer of bone-marrow from *C. scindens* colonized-  
44 mice into naïve-mice protected against ameba infection and increased intestinal neutrophils.  
45 Because of the known ability of *C. scindens* to metabolize the bile salt cholate, we measured  
46 deoxycholate and discovered that it was increased in the sera of *C. scindens* colonized mice, as  
47 well as in children protected from amebiasis. Administration of deoxycholate alone (in the  
48 absence of *C. scindens*) increased the epigenetic mediator JMJD3 and GMPs and provided  
49 protection from amebiasis. In conclusion the microbiota was shown to communicate to the bone  
50 marrow via microbially-metabolized bile salts to train innate immune memory to provide  
51 antigen-nonspecific protection from subsequent infection. This represents a novel mechanism by  
52 which the microbiome protects from disease.

53

54

55

56

57

58

59 **Main Text**

60 Commensal intestinal bacteria can protect from infection (1, 2) in part by modulating bone  
61 marrow production of immune effector cells such as neutrophils and inflammatory macrophages  
62 (3, 4). In addition infection with one organism may persistently alter innate immune populations  
63 via microbial metabolites to provide protection from infection with unrelated pathogens in a  
64 process coined “*trained immunity*” (12, 13). Epigenetic changes in genes important in innate  
65 immunity have been implicated as a mechanism for trained immunity (5–8). These include  
66 changes in histone H3K27 and H3K4 methylation associated with promotor regions of innate  
67 inflammatory genes (7). As such, microbial metabolite alteration of H3K27 demethylase  
68 expression might contribute to the development of innate trained immunity (7, 9, 10). Host  
69 damage-associated molecular pattern molecules (DAMPs) that can be systemically induced by  
70 the microbiota have also been shown to be important in upregulating demethylase expression in  
71 both myeloid cell lines and mouse bone marrow (11, 12). Collectively, these data support a role  
72 of serum soluble mediators induced by the microbiota in communicating to the bone marrow to  
73 influence immunity to infection. We sought here to better understand the mechanism by which  
74 protective trained immunity by the microbiota might occur during a human intestinal infection.

75

76 We had previously shown that gut colonization with the *Clostridia*-related mouse commensal  
77 Segmented Filamentous Bacteria (SFB) protected from *Entamoeba histolytica* infection (13).  
78 SFB persistently expanded bone marrow granulocyte monocyte progenitors (GMPs) (12) which  
79 produce neutrophils which are known to protect from amebiasis (14–16). We hypothesized that  
80 components of the gut microbiota might alter bone marrow hematopoiesis to confer protection  
81 against an unrelated pathogen such as *Entamoeba* (17, 18). To explore this possibility we first

82 tested for human commensals associated with protection from amebiasis (19). Principal  
83 coordinate analysis of beta-diversity indicated that the microbiome of children with *E. histolytica*  
84 diarrhea differed significantly (**Figure 1 A**) with a decrease in the relative abundance of the  
85 genus *Lachnospirillum* (**Figure 1 B**). *Lachnospirillum* have a number of members known to  
86 alter the metabolome including the bile acid pool of the intestine (20). We hypothesized that  
87 these bacteria may provide protection from ameba in part by altering the serum bile acid pool.  
88 To test this hypothesis we introduced the human commensal *Lachnospirillum* related bacteria  
89 *Clostridium scindens* (21, 22) into the gut microbiome of susceptible CBA/J mice (23) and  
90 challenged them with the parasite *E. histolytica*.

91 *C. scindens* was significantly increased in the microbiota after gavage as measured by  
92 relative expression of the baiCD oxidoreductase, and gut community structure was also altered  
93 (**Figure S4, A, B**). Introduction of *C. scindens* to the gut microbiome provided protection from  
94 *E. histolytica* (**Figure 1 C, E, F, Figure S3, S5**) and this protection was associated with  
95 increased intestinal neutrophil infiltration (**Figure 1 G**). This increase in gut neutrophils only  
96 occurred with Entamoeba infection (**Figure 1 D**). There was no significant difference in  
97 intestinal CD4<sup>+</sup> and CD8<sup>+</sup> T cells, eosinophils or inflammatory monocytes (**Figure 1 H-K**) in *C.*  
98 *scindens* colonized mice. Gavage with a non-*Clostridia* human mucosal anaerobic bacteria did not  
99 induce protection from Entamoeba (**Figure S5**).

100 Myeloid cell expansion such as observed here may be influenced by cytokine production by  
101 CD8<sup>+</sup> T cells (24) or intestinal T regulatory cell accumulation (25). To test for a contribution of  
102 the acquired immune system to *C. scindens*-mediated protection we utilized RAG-1<sup>-/-</sup> mice  
103 which lack B and T cells. RAG-1<sup>-/-</sup> mice were also protected from *E. histolytica* when colonized

104 with *C. scindens* (**Figure 1 F**) indicating that protection did not require the acquired immune  
105 system.

106 The increase in gut neutrophils in response to *Entamoeba* infection in *C. scindens* colonized  
107 mice suggested that *C. scindens* may have altered innate bone marrow populations that give rise  
108 to neutrophils. Therefore we examined hematopoietic progenitors in *C. scindens* colonized  
109 specific pathogen free mice (SPF) (**Figure 2 A, B**), SPF RAG-1<sup>-/-</sup> mice (**Figure 2C**) and *C.*  
110 *scindens* gnotobiotic mice and germ free controls (**Figure 2 D**). Intestinal colonization with *C.*  
111 *scindens* increased bone marrow granulocyte progenitor cells (GMPs, CFU-GM) (**Figure 2 A,**  
112 **B**). Expansion of GMPs mediated by *C. scindens* occurred in the absence of T cells (**Figure 1 C**)  
113 and colonization with *C. scindens* alone was sufficient to increase marrow GMPs (**Figure 1 D**).  
114 This suggested that innate immune cells primarily underlie the observed *C. scindens* mediated  
115 changes in hematopoiesis and protection from *Entamoeba*. Furthermore the work suggested there  
116 may be a persistent epigenetic change in the GMPs that could support increased neutrophil  
117 production with *Entamoeba* challenge and facilitate bone marrow mediated protection from the  
118 parasite. To explore this possibility we examined transcriptional and epigenetic changes in sorted  
119 marrow GMPs from *C. scindens* colonized mice (**Figure S2A**).

120 RNA sequencing and gene enrichment analysis suggested that genes associated with covalent  
121 modification of the histone H3 tail, such as the demethylase JMJD3, are enriched and  
122 upregulated in mice exposed to *C. scindens* (**Figure S2 A, B, C**). This includes the enrichment of  
123 genes associated with CCAAT/enhancer-binding proteins, known to be important for GMP and  
124 neutrophil differentiation and expansion (26) (**Figure S2 B**). QPCR of sorted marrow GMPs  
125 demonstrated that significant changes in expression occurred in JMJD3 and CEBPA (**Figure S2**  
126 **D-G, I**) Therefore we examined H3K4me3 and H3K27me occupancy in the promoter regions of

127 two genes from this analysis known to be important in granulopoiesis, CEBPA(27) and CEBPB  
128 (28) , in sorted GMPs. The repressive mark H3K27me3 was decreased in the promoter of  
129 CEBPA in *C. scindens* colonized mice (**Figure 3A**) while the activating mark H3K4me3 (**Figure**  
130 **3B**) was increased in the promoter of CEBPB in *C. scindens* colonized mice. This indicated that  
131 bone marrow epigenetic alteration occurred with gut colonization of *C. scindens* and suggested  
132 that persistent bone marrow changes might underlie the increased gut immunity to *Entamoeba* in  
133 colonized mice. To explore this possibility we utilized adoptive marrow transplants.

134 Adoptive transfer of bone marrow from *C. scindens* colonized mice into mice not previously  
135 exposed to *C. scindens* was sufficient to provide protection from *E. histolytica* as well as  
136 recapitulate the observed increase in marrow GMPs and intestinal neutrophils. In contrast  
137 previous epithelial exposure to *C. scindens* was not sufficient to provide protection from ameba  
138 in irradiated mice (**Figure 3 C-E**). We concluded that long-lasting alterations in marrow  
139 hematopoietic cells caused by gut exposure to *C. scindens* were sufficient to confer protection  
140 via a more robust intestinal neutrophil response to later *E. histolytica* challenge.

141  
142 We next explored how *C. scindens* could be epigenetically reprogramming GMPs in the bone  
143 marrow. *C. scindens* is capable of 7 $\alpha$ -dehydroxylation of bile acids in the intestine (4, 29). As we  
144 expected, colonization of mice with *C. scindens* increased serum levels of the secondary bile acid  
145 deoxycholic acid (DCA, a product of 7 $\alpha$ -dehydroxylation of cholic acid) and increased bile  
146 acid deconjugation (**Figure 4 A, Figure S1, Figure S2 H**). Deoxycholate was also increased in  
147 children protected from *E. histolytica* (**Figure 4 B**). We replicated this finding that serum DCA  
148 independently predicted intestinal *E. histolytica* infection in a second childhood cohort from

149 Bangladesh (**Table ST1**). We concluded that DCA in plasma was positively correlated with  
150 protection from *Entamoeba* in the mouse model of amebic colitis and in children.

151 To test if DCA was sufficient to mediate trained immunity against *Entamoeba* we  
152 administered the bile salt intravenously. Administration of deoxycholate prior to *Entamoeba*  
153 infection increased serum levels of deoxycholate to levels comparable to *C. scindens*  
154 colonization (**Figure 4 C, D, and E**) and provided protection from infection in the animal model  
155 (**Figure 4 F**). Protection from *Entamoeba* was associated with increased marrow GMPs and gut  
156 neutrophils (**Figure 4 G, H**). Additionally, experimental elevation of serum DCA increased  
157 expression of the epigenetic mediator JMJD3 in sorted marrow GMPs (**Figure S2 G-I**). We  
158 concluded that DCA was sufficient to replicate the changes in GMPs and protection from  
159 *Entamoeba* afforded by *C. scindens*. These studies however do not rule out the potential  
160 contribution of other bile acids and metabolites to gut to bone marrow communication.

161 Deoxycholate-mediated protection from *E. histolytica* was associated with increased marrow  
162 GMPs and intestinal neutrophils as seen with *C. scindens* (**Figure 1 E, F, G**). We were interested  
163 in pathways by which deoxycholate or *C. scindens* increased GMPs. Due to the epigenetic  
164 changes observed (**Figure 3 A, B**), persistent nature of immunity to *E. histolytica* following bone  
165 marrow transplant (**Figure 3 C-E**), and upregulation of JMJD3 in sorted marrow from *C.*  
166 *scindens* colonized or DCA treated mice (**Figure S2**), we examined the role of JMJD3 activity  
167 during *C. scindens* colonization on protection from *Entamoeba* infection. Treatment with an  
168 inhibitor of JMJD3 during *C. scindens* colonization abrogated bone marrow GMP expansion  
169 (**Figure S3 A**) as well as induction of intestinal neutrophils and protection from *E. histolytica*  
170 (**Figure S3 E, F**). This suggests that this epigenetic mediator and H3K27 demethylase activity  
171 may contribute to gut to marrow communication by *C. scindens*. Future studies will examine this

172 possibility in more depth. JMJD3 is an H3K27me3 demethylase (10, 30, 31), however, we also  
173 observed changes in H3K4me3 in the promoter region of CEBPB. JMJD3 has recently been  
174 shown to impact H3K4me3 levels in human acute myeloid leukemia (AML) cells (32). However  
175 this may not fully explain the epigenetic changes in our model and other epigenetic mediators,  
176 including other non-methyl modifications such as H3K27Ac, might influence gut microbiota  
177 mediated communication with the bone marrow.

178 The results presented here suggest a model whereby gut colonization with *C. scindens*  
179 increases serum deoxycholate that then acts on the marrow to increase transcription of genes that  
180 support granulocyte monocyte progenitor (GMP) expansion, such as CCAAT/enhancer-binding  
181 proteins CEBPA and CEBPB. Then, when a novel challenge occurs at a mucosal site (in this  
182 case infection with *E. histolytica*), a more robust neutrophil response results.

183 Future studies will examine the precise mechanisms by which *C. scindens* colonization alters  
184 bone marrow hematopoiesis, which are not fully elucidated by these studies. However this work  
185 yields a mechanistic understanding of how changes in the gut microbiome can result in antigen  
186 nonspecific protection from *Entamoeba histolytica* infection. The impact of the work extends  
187 beyond infectious disease to fundamental mechanisms of gut to bone marrow communication by  
188 commensal bacteria and innate trained immunity. These studies may help in development of  
189 novel treatments that modulate the severity of immune and inflammatory diseases by altering  
190 bone marrow production of inflammatory cells.

## 191 **Acknowledgments**

192 We thank Tuhinur Arju, and Mamun Kabir at icddr, b, Jeremy Gatesman, Homer Ransdell ,  
193 Alice Kenney and Sanford Feldman at the University of Virginia Center for Comparative  
194 Medicine, Michael Solga, Claude Chew, and Joanne Lannigan at the Flow Cytometry Core



195 facility, AhnThu Nguyen at the Biology Department Genomics Core, and Katia Sol-Church and  
196 Alyson Prorock at the Genome Analysis and Technology Core, Todd Fox at the UVA  
197 Metabolomics core, and Epigentek, NY, for technical support. **Funding.** The work was  
198 supported by National Institutes of Health National Institute of Allergy and Infectious Diseases  
199 Grants R01AI-26649 and R01 AI043596 (WAP), by the Bill and Melinda Gates Foundation, by  
200 Robert and Elizabeth Henske and 1R21AI130700 (SLB). **Author's contributions.** SLB, JLL,  
201 JU, NO, KW, MS, MS, NG, BAT and BM performed the experiments. SLB, JLL, DTA, ST, DO,  
202 NG, JZM, ZP, BM and BAT analyzed the data. WAP, SLB, JS, RH, JZM, supervised the  
203 experiments and data analysis. SLB and WAP developed the theoretical framework. All authors  
204 discussed the results and contributed to the preparation of the manuscript. **Competing interests.**  
205 The authors declare no competing financial interests. **Data and materials availability.** Data is  
206 available in the manuscript and supplemental figures. Full sequencing data will be deposited to  
207 the GEO repository under accession number GSE121503, the SRA under accession number  
208 PRJNA503904 and under SRA and linked via the dbGaP accession number phs001478.v1.p1.  
209 All data is available upon request.

210

211

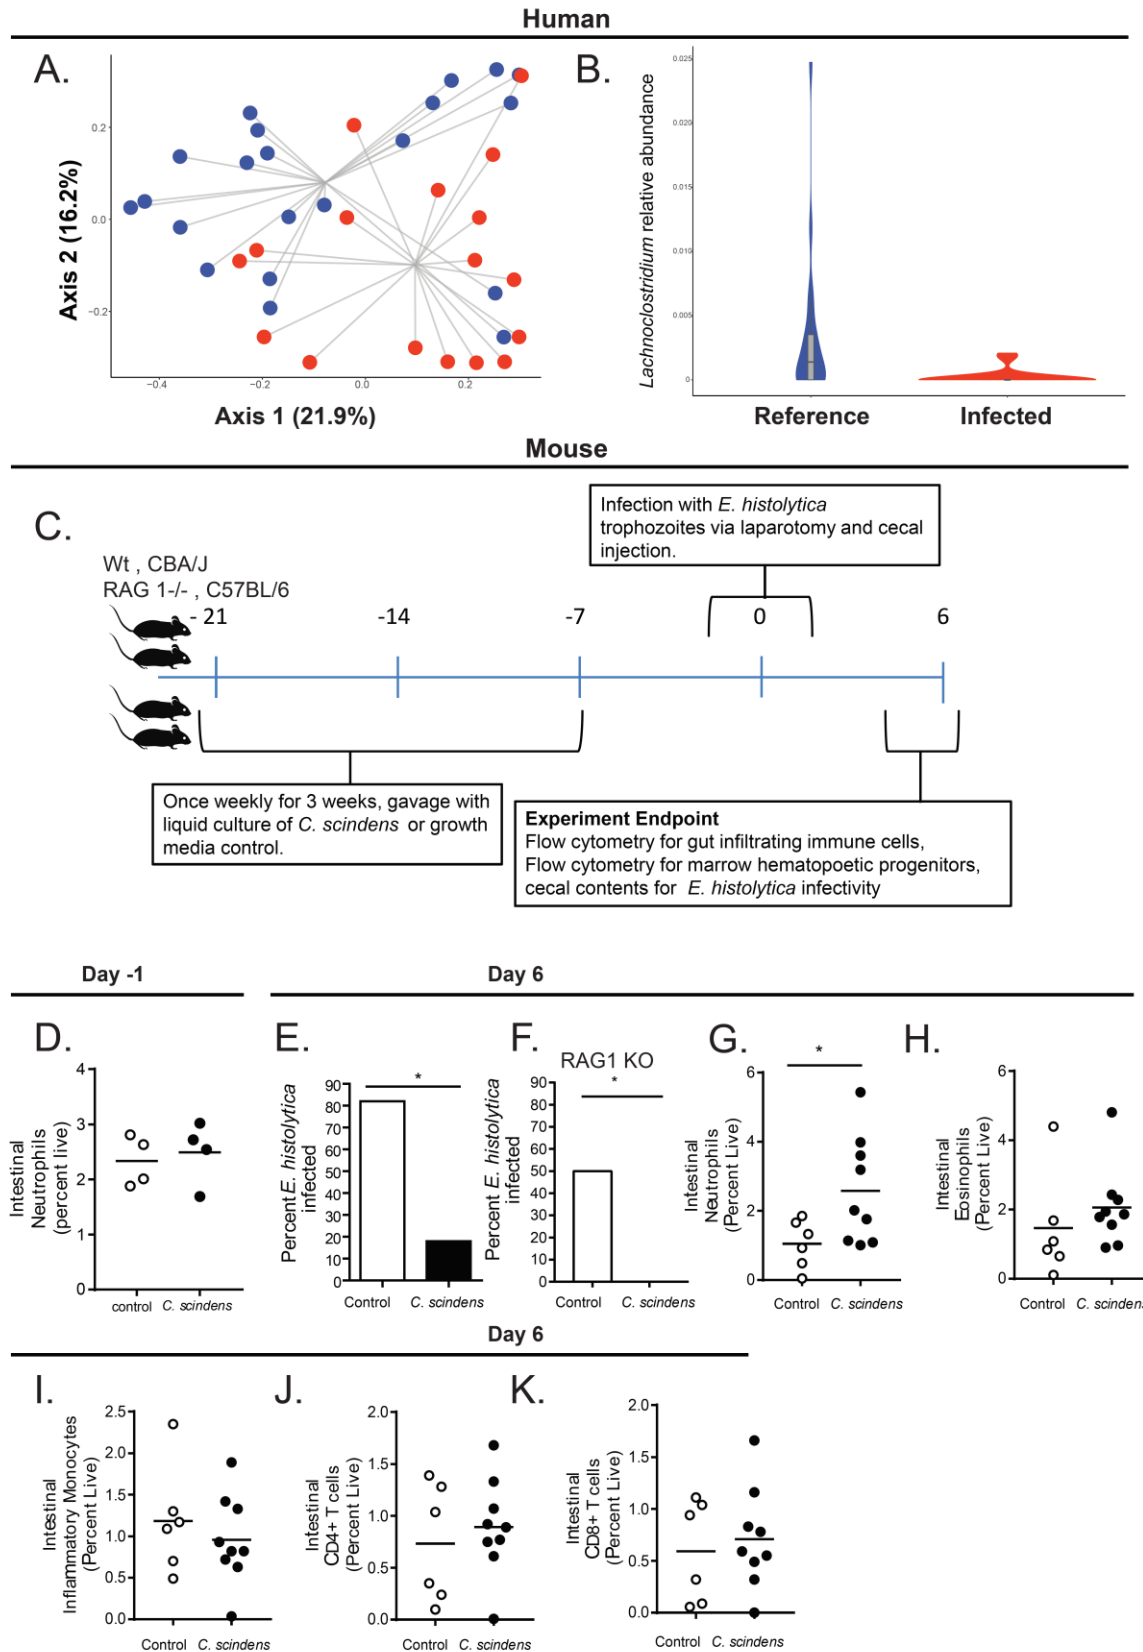

213 **Figure 1. *Lachnoclostridium* are associated with protection from *Entamoeba histolytica* and**  
214 **introduction of *Clostridium scindens* to the gut microbiota provides innate protection from**  
215 ***Entamoeba histolytica* in a murine model. (A)** Principal Coordinate Analysis (PCoA) of Bray-  
216 Curtis dissimilarities (beta-diversity) of fecal microbiota from surveillance reference stool or *E.*  
217 *histolytica* infected children. The groups are significantly different by PERMANOVA. **(B)**  
218 Relative abundance of the genus *Lachnoclostridium* from samples described in **A**. The groups  
219 are significantly different by Wilcoxon rank sum test with continuity correction. **(C)** CBA/J mice  
220 or C57BL/6 RAG1 KO mice were colonized with bile acid 7 $\alpha$ -dehydroxylating bacteria *C.*  
221 *scindens* (ATCC® 35704) over three weeks prior to intracecal infection with *E. histolytica*. **(D)**  
222 Gut neutrophil infiltration was determined prior to ameba infection via flow cytometry. **(E, F)**  
223 Percent of mice infected with *Entamoeba* at day six following infection was determined via cecal  
224 culture in trophozoite culture media. **(G-K)** Gut immune cell infiltration was determined via flow  
225 cytometry. \*  $p < 0.05$ , PERMANOVA (ordination), Student's t-test, Mann–Whitney U test, bars  
226 and error bars are mean and SEM.  $p = 0.006365$ , Wilcoxon rank sum test.  $N = 4-9$  mice per group  
227  $N = 20$  children per condition.

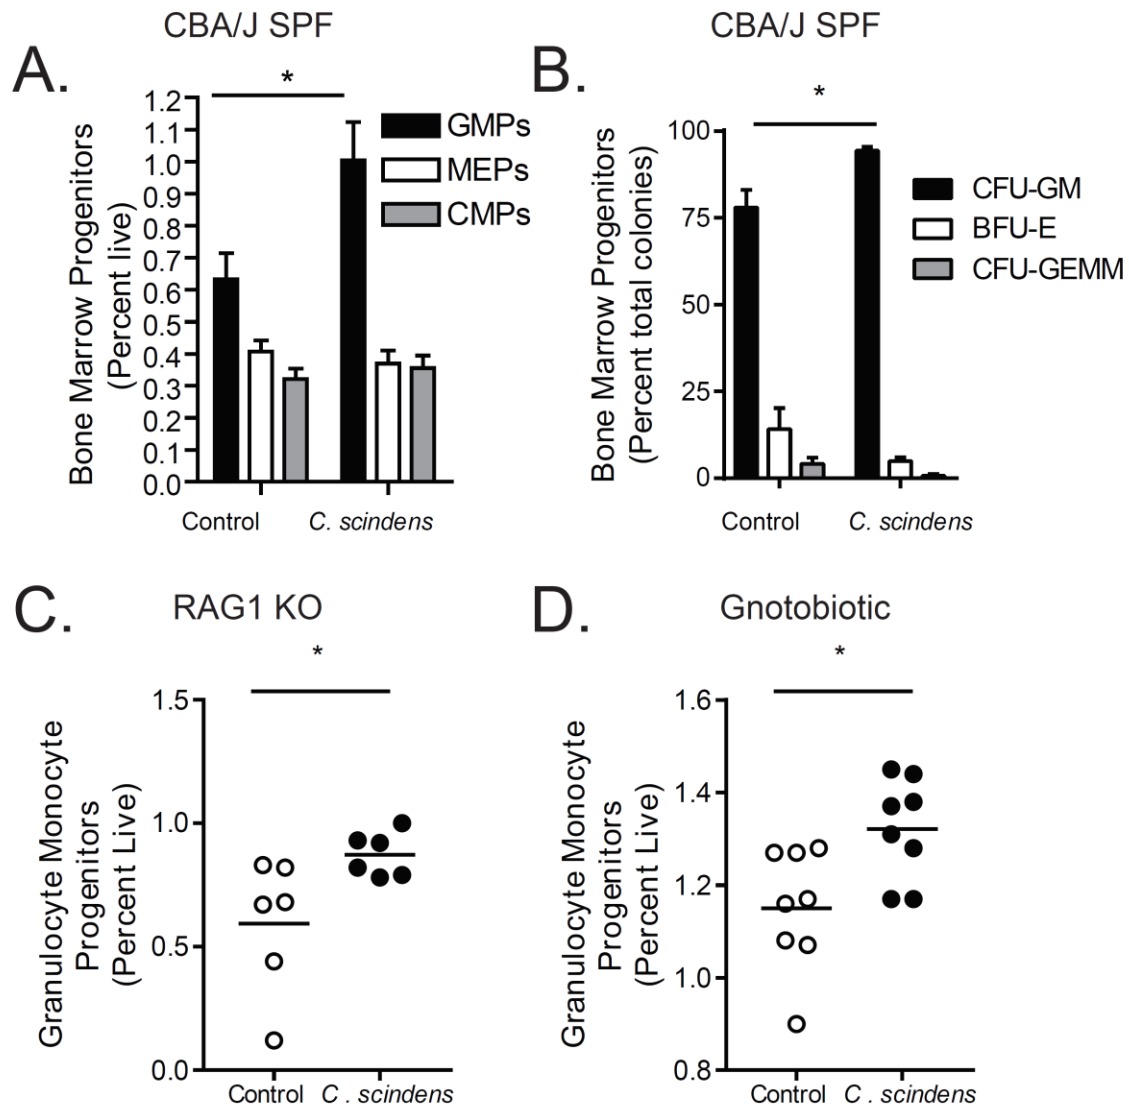

228

229 **Figure 2. Intestinal colonization with *C. scindens* expands bone marrow granulocyte**

230 **monocyte progenitors.** CBA/J mice or C57BL/6 RAG1 KO mice were colonized with bile acid

231 *7 $\alpha$* -dehydroxylating bacteria *C. scindens* (ATCC® 35704) over three weeks prior to intracecal

232 infection with *E. histolytica*. (A, C, D) Flow cytometry and (B) colony forming assays were

233 utilized to determine composition of marrow hematopoietic precursors in *C. scindens* colonized

234 CBA/J or RAG1 KO mice. \*= p<0.05, Student's t-test, bars and error bars are mean and SEM. N

235 =6-8 mice per group.

236

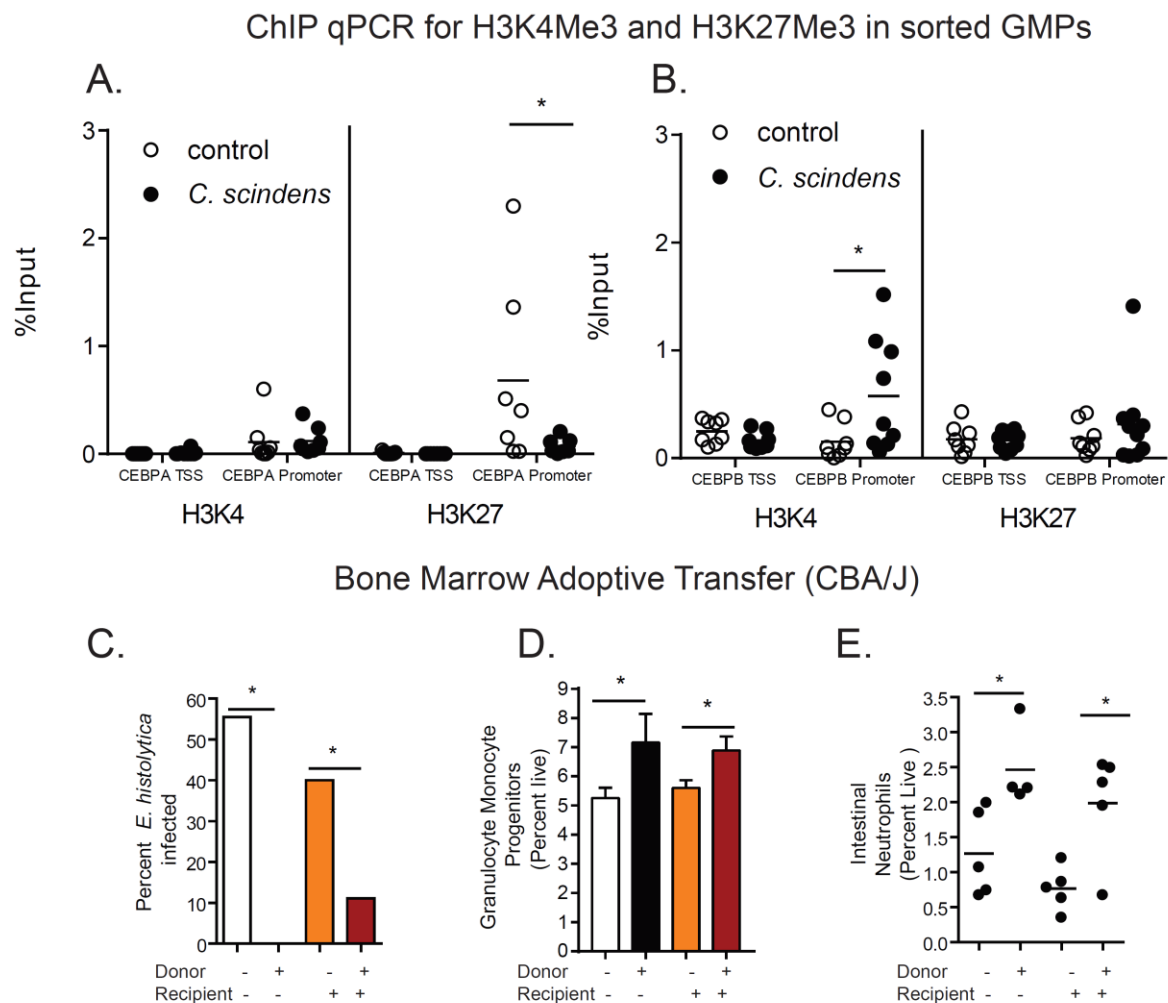

237

238 **Figure 3. *Clostridium scindens* colonization epigenetically alters granulocyte monocyte**  
 239 **progenitors and bone marrow from *C. scindens* colonized donors is sufficient to provide**  
 240 **protection from *Entamoeba* in *C. scindens* naïve mice. (A, B) ChIP for H3K4me3 and**  
 241 **H3K27me3 was performed followed by qPCR for the transcription start site (TSS) and promoter**  
 242 **for CEBPA and CEBPB on sorted GMPs from mice colonized with *C. scindens* or control mice.**  
 243 **(C-E). CBA/J mice colonized with *C. scindens* (+) or not (-) were lethally irradiated and given**  
 244 **whole marrow from *C. scindens* (+) or *C. scindens* (-) donors then allowed to recover for 7**

245 weeks prior to Entamoeba challenge. **(C)** Percent infectivity with ameba, **(D)** change in marrow  
246 GMPs, and **(E)** gut neutrophil infiltration were determined at 8 weeks post BMT. \*= p<0.05,  
247 Student's t-test, Mann–Whitney U test, One Way ANOVA with Tukey post-test, bars and error  
248 bars are mean and SEM. N = 6-8 mice per group.

249

250

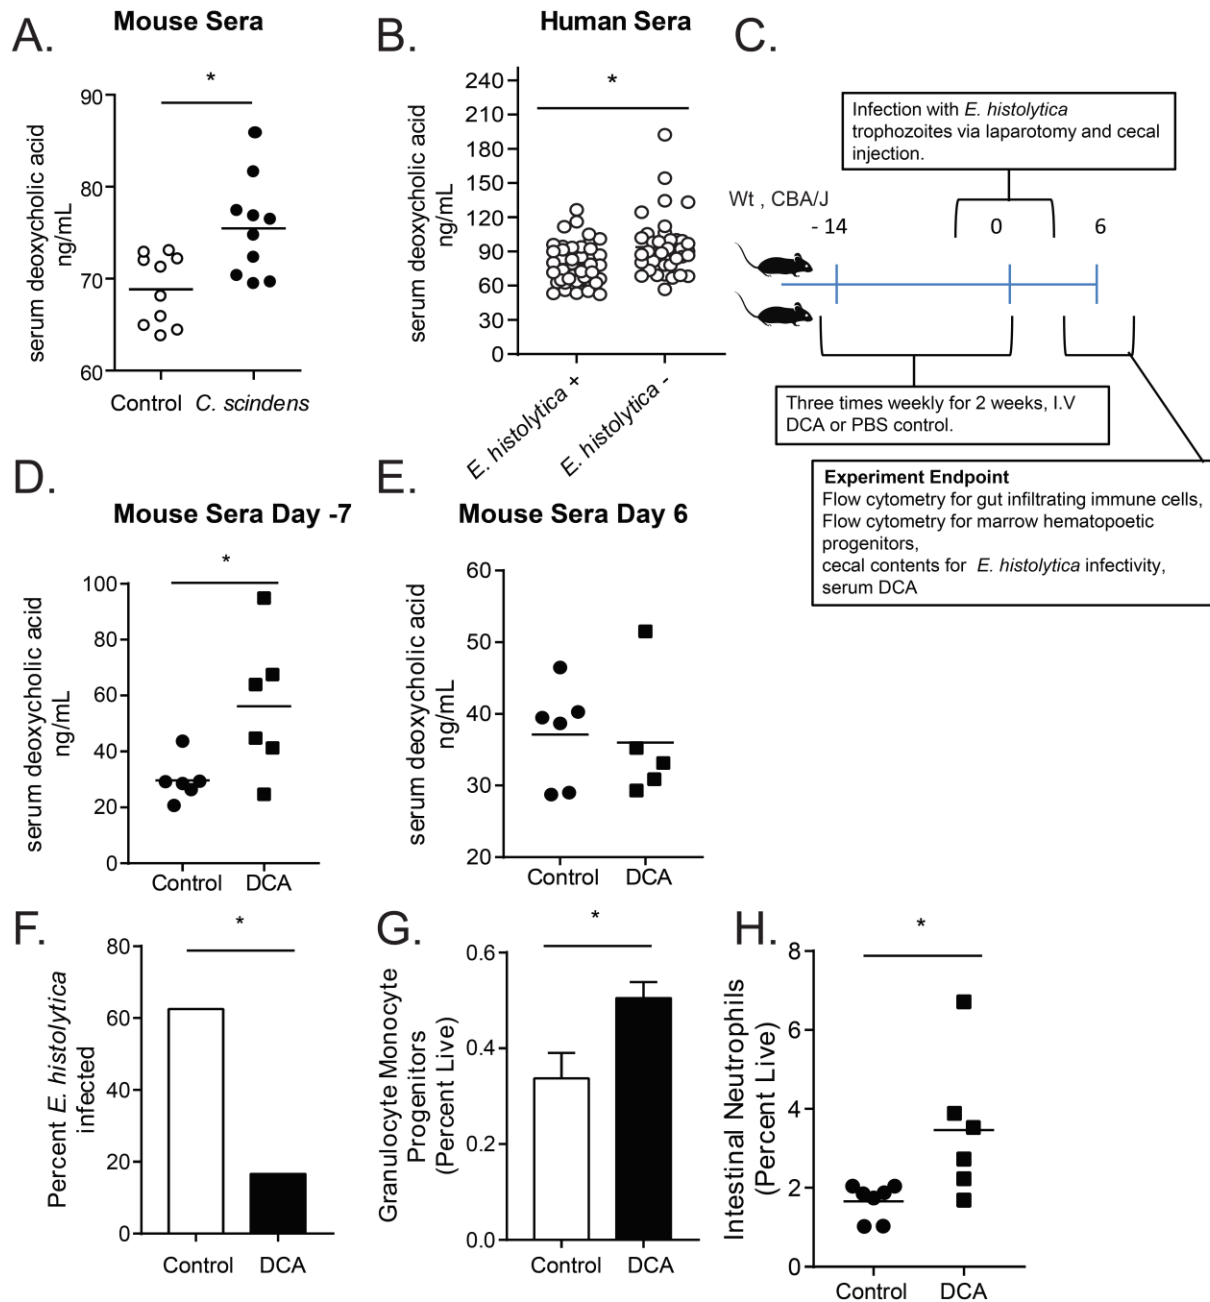

251

252 **Figure 4. *C. scindens* colonization increases serum deoxycholic acid (DCA) and increased**

253 **serum DCA is associated with protection from Entamoeba in both children and in a mouse**

254 **model. (A) CBA/J mice were colonized with *C. scindens* and serum DCA was measured. (B)**

255 **Serum DCA was measured via ELISA in 2 year old children in Bangladesh that were free of (-)**

256 or infected with (+) *E. histolytica* within 6 months of the blood draw. **(C)**. Mice were  
257 administered DCA intravenously three times a week for two weeks and then challenged with *E.*  
258 *histolytica*. Serum DCA was measured during week 1 **(D)**, and at the end of the experiment **(E)**.  
259 Percent infectivity **(F)**, change in marrow GMPs **(G)** and gut neutrophils **(H)** were measured at  
260 the end of the experiment. \*= p<0.05, Student's t-test, Mann–Whitney U test. N =6-8 mice per  
261 group. N= 40 children per condition.

262

263

264

265

266

267

268

269

270

271

272

273

274



275

276

277

Supplementary Materials for

278

**Title: Gut microbiome communication with bone marrow regulates susceptibility to**

279

**amebiasis.**

280

281

282 **This PDF file includes:**

283

Figures ST1, S1 to S5

284

Materials and Methods

285

286

287

| Risk factor                | OR                | 95% CI |       | p value |
|----------------------------|-------------------|--------|-------|---------|
|                            |                   | Lower  | Upper |         |
| Serum DCA                  | 0.19 <sup>†</sup> | 0.09   | 0.40  | <0.0001 |
| Fecal calprotectin         | 0.95 <sup>†</sup> | 0.90   | 1.01  | 0.0978  |
| HAZ at enrollment          | 0.86              | 0.47   | 1.59  | 0.6301  |
| Monthly family expenditure | 1.00 <sup>†</sup> | 0.99   | 1.01  | 0.4728  |
| Mother's education         | 0.28              | 0.06   | 1.26  | 0.0970  |

OR: odds ratio; CI: confidence interval; HAZ: height-for-age z-score;  
DCA: deoxycholic acid;

<sup>†</sup> OR was calculated for 100 unit increment in the risk factor

288

289 **Table ST1. Serum DCA independently predicts intestinal *E. histolytica* infection in a**  
290 **childhood cohort in Bangladesh and fecal calprotectin improves the predictability of *E.***  
291 ***histolytica* infection**

292 The association of serum DCA with intestinal *E. histolytica* infection was evaluated in logistic  
293 regression, adjusting for HAZ at enrollment, monthly family expenditure, and mother's  
294 education. The regression was performed with and without consideration of fecal calprotectin.  
295 Although the effect of fecal calprotectin on *E. histolytica* infection was only marginally  
296 significant, the model with fecal calprotectin showed better c-statistic and thus was preferred.  
297 The c-statistic of 0.896 for the final model indicated near excellent predictive power for  
298 intestinal *E. histolytica* infection. N= 40 children per condition.

299

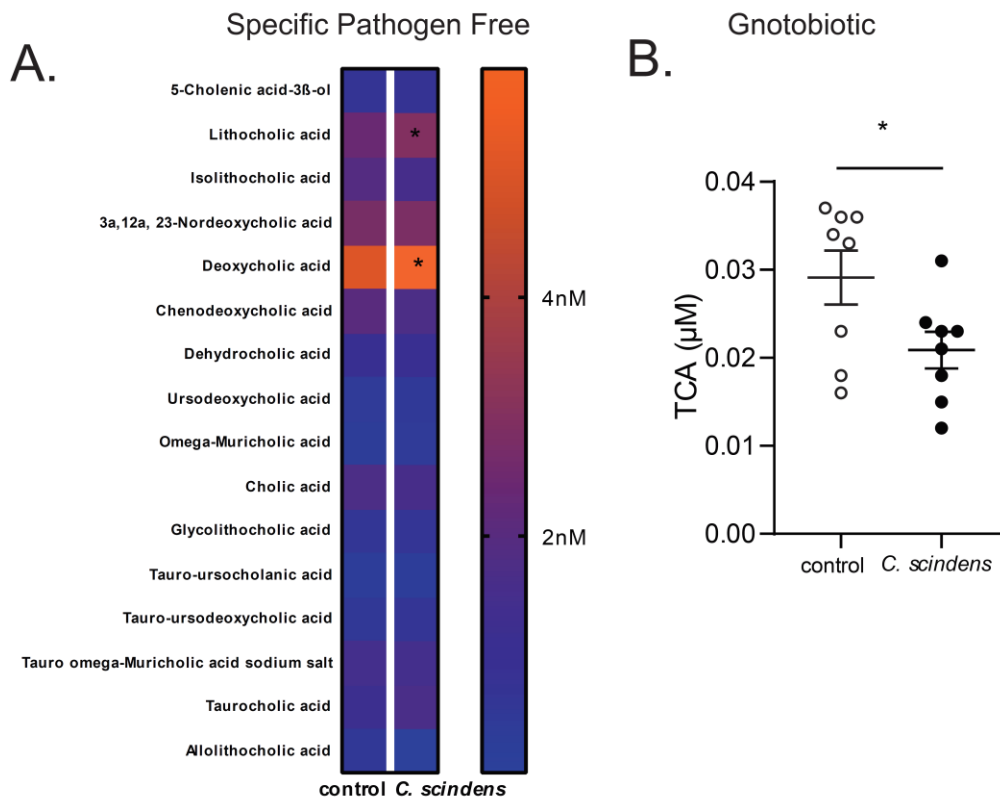

300

301 **Figure S1. Serum bile acid profile of *Clostridium scindens* colonized mice is associated with**  
302 **increased bile acid deconjugation in both conventionally raised and gnotobiotic mice.**

303 CBA/J mice were colonized with *C. scindens* (ATCC® 35704), a bacterium capable of the 7 $\alpha$ -  
304 dehydroxylation of bile acids, over three weeks prior to intracecal infection with *E. histolytica*.

305 (A) Serum bile acids were measured using ultra-performance liquid chromatography-mass  
306 spectrometry in *C. scindens* gavaged and control animals. \*= p<0.05, Fishers LSD. (B) C57BL/6  
307 germ free mice were colonized with *C. scindens* with a single gavage. Serum bile acids were  
308 measured using ultra-performance liquid chromatography-mass spectrometry in *C. scindens*  
309 gavaged and control animals. \*= p<0.05, Students T test, two tailed. Significant results with  
310 taurocholic acid (TCA) only. N =8 mice per group

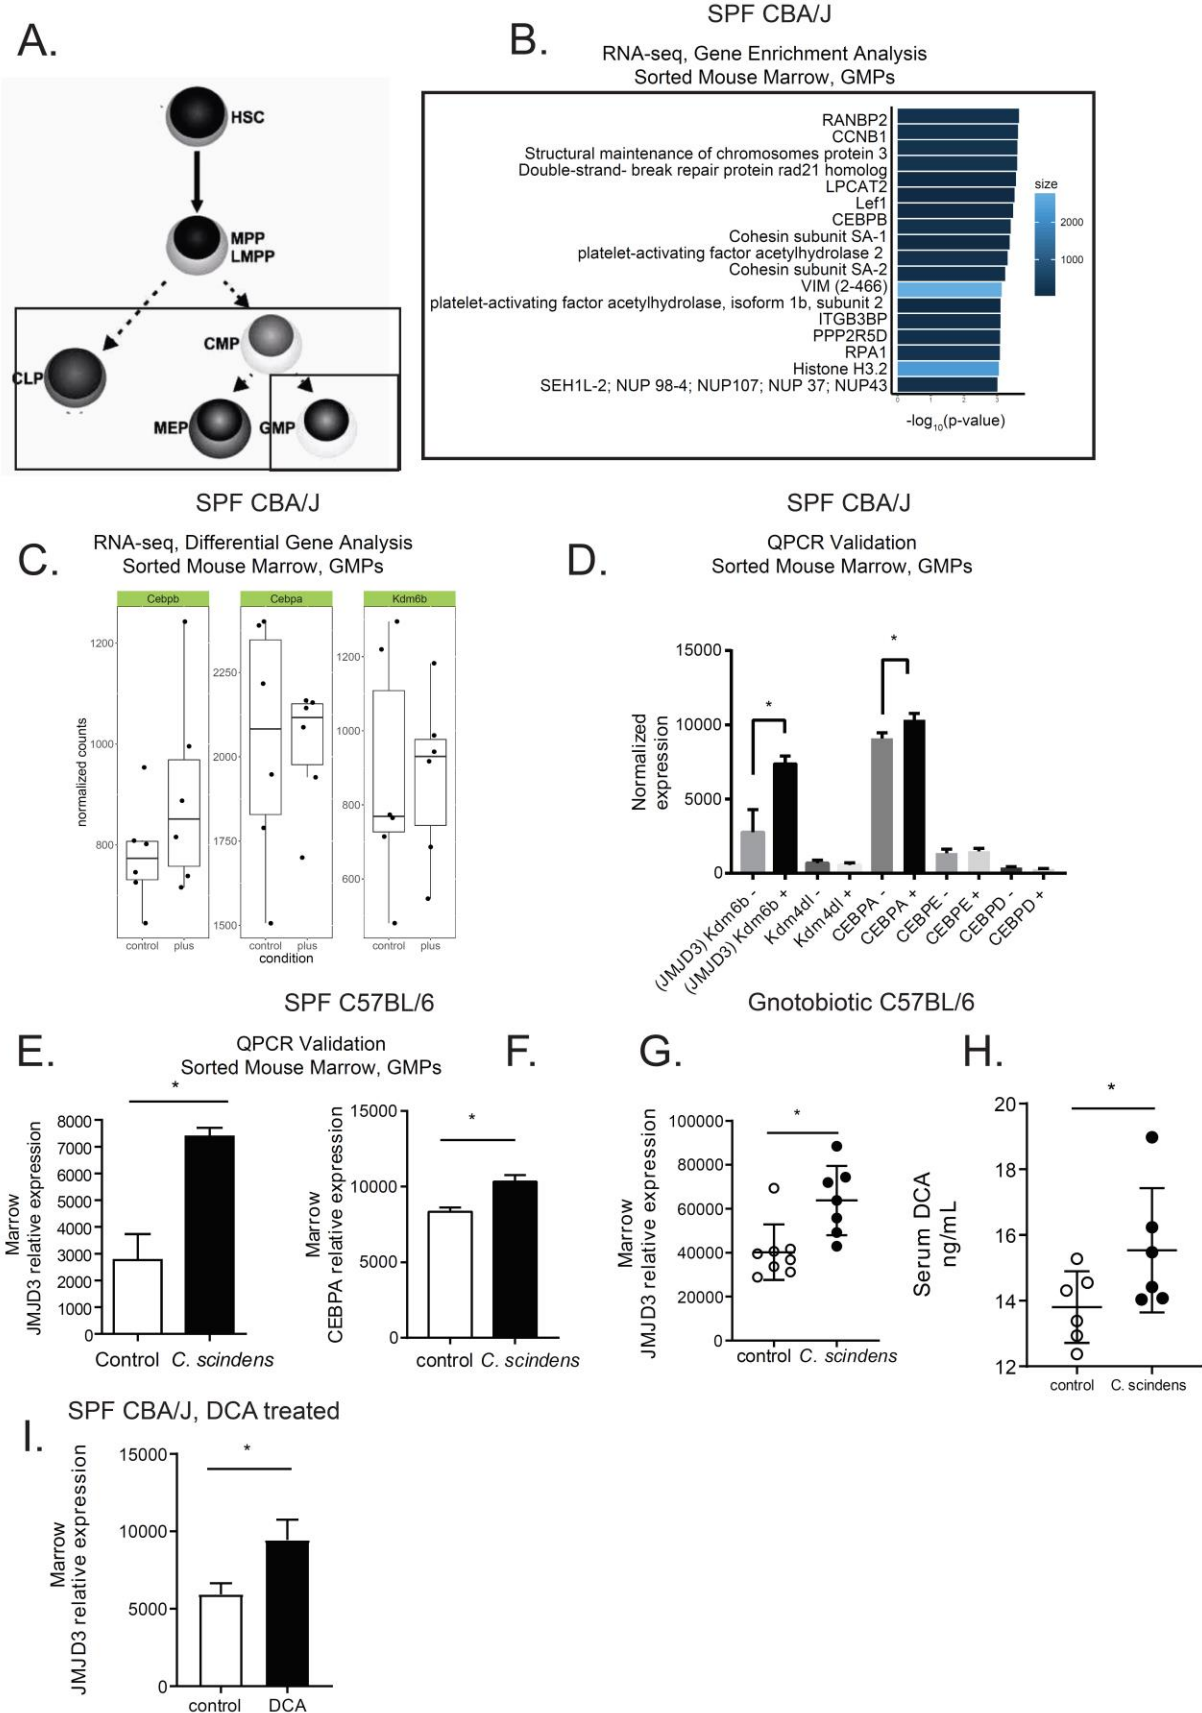

312 **Figure S2. Intestinal colonization with *Clostridium scindens* increases expression of H3K27**  
313 **demethylase JMJD3 and granulopoiesis promoting transcription factors in bone marrow**  
314 **granulocyte monocyte progenitors. (A)** Bone marrow was sorted into CMP, GMP, MEP and  
315 CLP from specific pathogen free (SPF) CBA/J **(B, C, D, I)**, C57BL/6 **(E,F)** or C57BL/6  
316 Gnotobiotic mice **(G,H)** that were colonized with *Clostridium scindens* or treated with DCA **(I)**.  
317 **(B, C)** RNA-seq analysis and **(D-G, I)** qPCR was performed to validate enriched genes from  
318 RNA-seq on cDNA prepared from RNA isolated from sorted GMPs. **(B)** Gene set enrichment  
319 results obtained using ConsensusPathDB. The plot shows the most over-represented functional  
320 gene clusters associated with the top 50% of genes ranked by unadjusted P value. Note that the  
321 CEBPB gene set was identified as an enriched functional network using this unbiased approach.  
322 **(D-G, I)** Expression of noted genes was normalized to a housekeeping gene (S14). **(G)** Serum  
323 DCA was measured via ELISA **(H)**. \*= p<0.05, Student's t-test, One Way ANOVA with Tukey  
324 posttest. N =6-12 mice per group

325

326

327

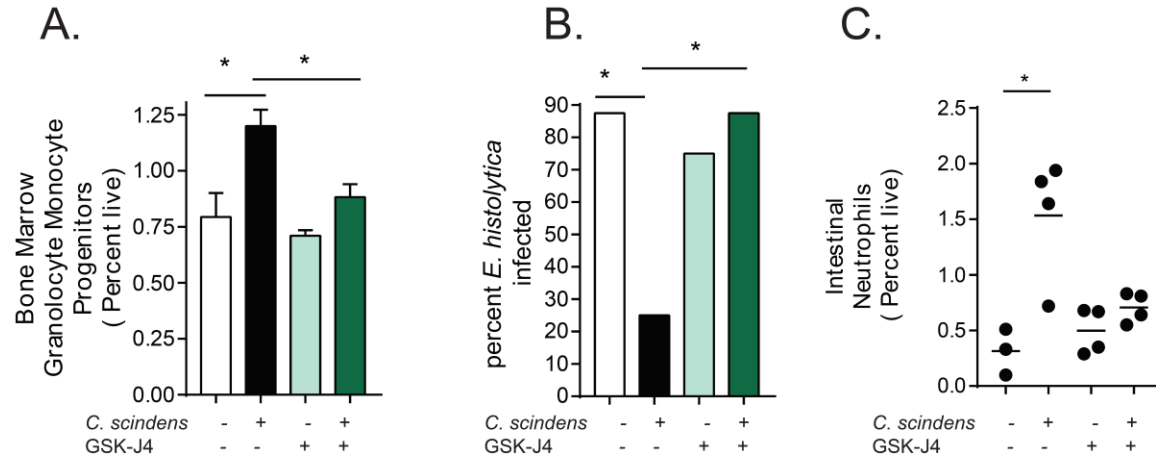

328

329 **Figure S3. Blockade of H3K27 demethylase JMJD3 during *C. scindens* colonization**

330 **abrogates marrow GMP expansion and intestinal protection from *E. histolytica*. CBA/J**

331 mice were treated with an inhibitor of the epigenetic mediator JMJD3 (GSK-J4) (-, +) before and

332 during *C. scindens* colonization (-, +) but prior to infection with ameba. **(A)** Bone marrow

333 progenitor populations, **(B)** percent infectivity and **(C)** intestinal neutrophils were analyzed via

334 flow cytometry and culture. \*= p<0.05, Student's t-test, Mann-Whitney U test, one way ANOVA

335 with Tukey posttest. N =4-12 mice per group.

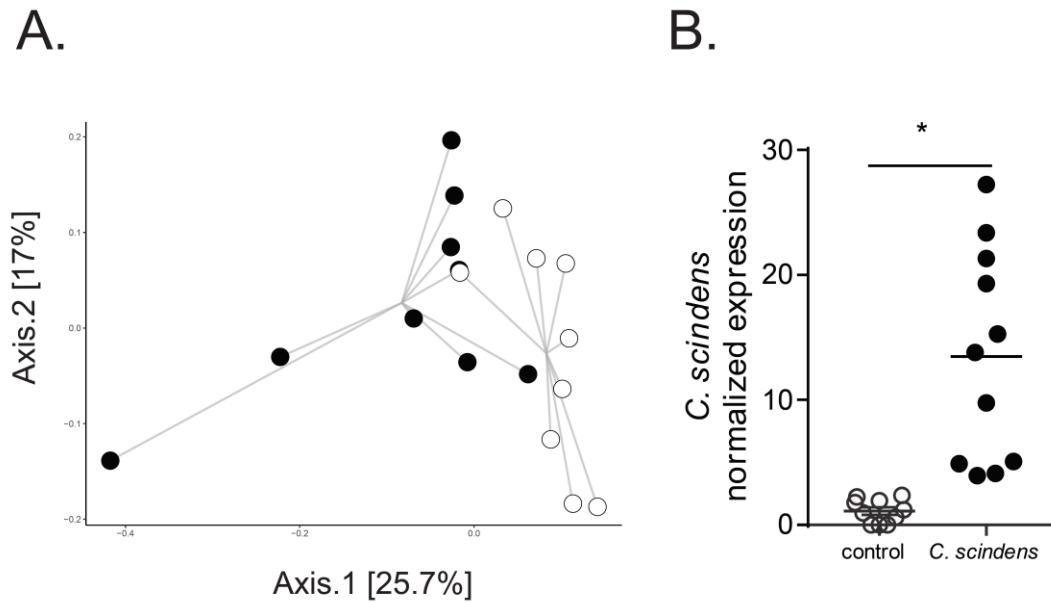

336

337 **Figure S4. Introduction of *Clostridium scindens* to the gut microbiota alters community**  
338 **structure in mice.** CBA/J mice were colonized with bile acid 7 $\alpha$ -dehydroxylating bacteria *C.*  
339 *scindens* (ATCC® 35704) over three weeks prior to intracecal infection with *E. histolytica*. (A)  
340 Composition of the cecal microbiota community structure was determined by sequencing of V4  
341 region of the 16S rRNA gene. PCoA of Bray-Curtis dissimilarities, the groups are significantly  
342 different by PERMANOVA,  $p = 0.002$ . (B) Relative expression of *C. scindens* baiCD stereo-  
343 specific 7 $\alpha$ /7 $\beta$ -hydroxy-3-oxo- $\delta$ 4-cholenoic acid oxidoreductase normalized to total  
344 eubacterial 16S rRNA was determined via qPCR. \* =  $p < 0.05$ . N = 9-12 mice per group.

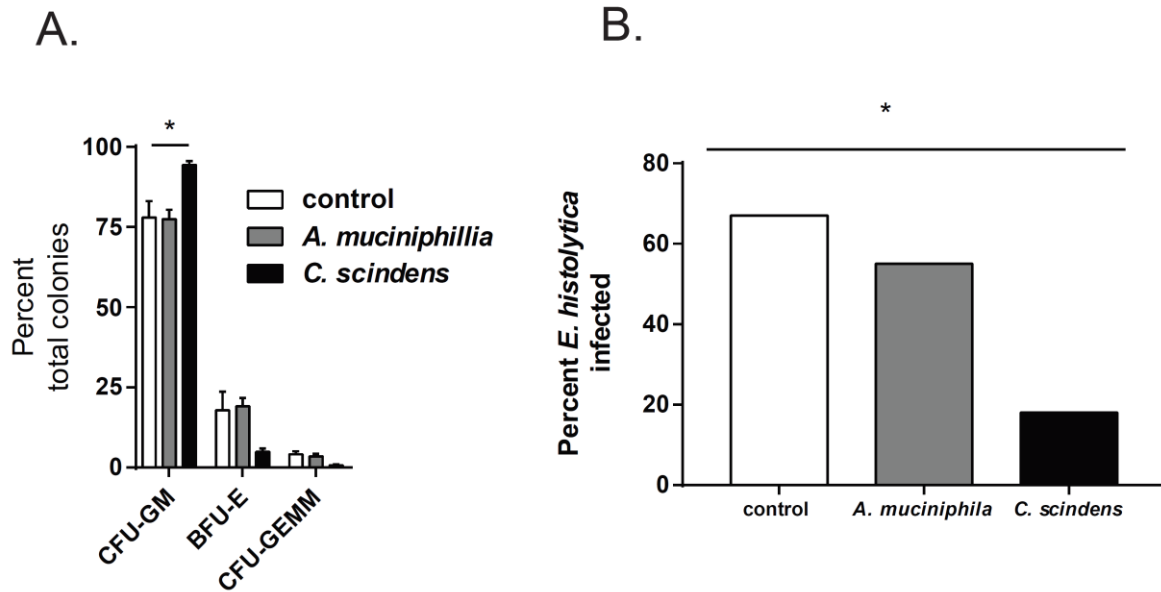

345

346 **Figure S5. Introduction of human commensal *Akkermansia muciniphila* to the gut**

347 **microbiota does not increase marrow GMPs or provide significant protection from *E.***

348 ***histolytica*.** (A) CBA/J mice were colonized with *Akkermansia muciniphila* (ATCC ®BAA-835)

349 or *C. scindens* (ATCC® 35704) over three weeks prior to intracecal infection with *E. histolytica*.

350 (B) Composition of marrow hematopoietic precursors was determined via colony forming assays

351 in mice. Percent infectivity with ameba at day six following infection was determined via cecal

352 culture in trophozoite supporting media. \*= p<0.05, Student's t-test, bars and error bars are mean

353 and SEM. N =6 mice per group.

354

355

356

357

358

359

360



361 **Methods**

362 **Mice**

363 Five week old male CBA/J mice (Jackson Laboratories or RAG 1 KO mice (Jackson  
364 Laboratories) were housed in a specific pathogen-free facility in micro isolator cages and  
365 provided autoclaved food (Lab diet 5010) and water ad libitum. Specific pathogen free status  
366 was monitored quarterly. Quarterly, a sentinel mouse (or rat) was removed from each room and  
367 humanely euthanized for serologic evaluation, examination of pelage for fur mites, and  
368 examination of cecal contents for pinworms. The serologic assays, conducted in-house using  
369 CRL reagents, were MHV, EDIM, GD-7, MVM, MPV, and MNV, (Sendai, PVM, RPV/  
370 KRV/H-1, *M. pulmonis*, and SDAV for rats). In the final quarter, a comprehensive serology was  
371 run which included the above agents plus K-virus, MCMV, MTV, LCM, Ectromelia,  
372 Polyomavirus, Reovirus-3, and mouse adenoviruses (K87 and FL). For Gnotobiotic experiments  
373 Germ free C57BL/6 mice (Taconic) were housed in flexible film units (Park Bio) in a facility  
374 regularly monitored for germ free status by aerobic and anerobic culture and the above assays by  
375 the UVA Center for Comparative medicine. Cylinders were prepared and supplies and sterile  
376 food and water were introduced into the units according to SOP. Germ-free mice from Taconic  
377 were introduced into the units. Mice were gavaged once with sterile media or *C. scindens* as in  
378 SPF mice below. Aerobic and anerobic cultures of fecal samples were performed at introduction  
379 and once during the 2 week experiment as well as Sanger sequencing of isolated stool DNA  
380 using broad range eubacterial primers to confirm mono-association with *C. scindens* and germ  
381 free status of control animals. EUB forward 5'-ACTCCTACGGGAGGCAGCAGT-3'EUB  
382 reverse 5'-ATTACCGCGGCTGCTGGC-3'. One-week and two weeks post animal placement in  
383 the unit, surface cultures were performed to ensure sterility of unit. All contact areas, shipping

384 containers and transfer apparatus were also cultured to confirm germ free status. All procedures  
385 were approved by the Institutional Animal Care and Use Committee of the University of  
386 Virginia. All experiments were performed according to provisions of the USA Animal Welfare  
387 Act of 1996 (Public Law 89.544). All experiments shown are representative of 2-4 experimental  
388 replicates.

389

### 390 ***Clostridium scindens* colonization**

391 CBA/J mice (Jackson) were colonized with bile acid 7 $\alpha$ -dehydroxylating bacteria *C. scindens*  
392 (ATCC® 35704) over three weeks prior to intracecal infection with *E. histolytica* or analysis for  
393 gut microbiome community structure, or marrow RNA seq and ChIP . Mice were gavaged with  
394 100ul of overnight culture at an optical density of 1.4 at 600nm or media control (BHI, Anerobe  
395 Systems, AS-872) once per week for specific pathogen free mice over three weeks, and once for  
396 C57BL/6 (Taconic) gnotobiotic mice over two weeks.

397

### 398 **Intravenous deoxycholate treatment**

399 CBA/J mice were treated intravenously via tail vein injection by a trained veterinary technician 3  
400 times a week, over two weeks with 400uL of PBS or 400uL of 0.20mg/mL DCA (Sigma) in PBS  
401 per treatment. Mice were healthy during DCA administration and no liver damage as measured  
402 via serum ALT ELISA (Cloud-Clone Corp, SEA207Mu) was observed. Liver also appeared  
403 grossly normal on dissection.

404

### 405 **Adoptive Marrow Transplant**

406 Donor and recipient CBA/J mice were colonized with bile acid 7 $\alpha$ -dehydroxylating bacteria *C.*  
407 *scindens* (ATCC® 35704) or treated with media controls as above. CBA/J mice colonized with  
408 *C. scindens* (+) or not were lethally irradiated, then immediately given whole marrow from *C.*  
409 *scindens* (+) or *C. scindens* (-) donors then allowed to recover for 7 weeks prior to ameba  
410 challenge. Irradiation was performed with 900 Rad in a single dose from a Shepard irradiator,  
411 Mark 1 Model 68A Dual, Serial Number 1163 with a Cs-137 source. All irradiation experiments  
412 were supervised by a member of the University of Virginia Environmental Health and Safety  
413 team. Mice were placed on sulfamethoxazole-trimethoprim containing water 3 days  
414 prior and 21 days post bone marrow transplant. Experiments shown are representative of 2  
415 experimental replicates.

416

#### 417 ***E. histolytica* culture and intracecal injection.**

418 Animal-passaged HM1:IMSS *E. histolytica* trophozoites were cultured from cecal contents of  
419 infected mice in complete trypsin-yeast-iron (TYI-33) medium supplemented with Diamond  
420 Vitamin mixture (JRH Biosciences), 100 U/ml of both penicillin and streptomycin, and 5% heat  
421 inactivated bovine serum (Sigma-Aldrich). Prior to injection, trophozoites were grown to log  
422 phase, and 3 x 10<sup>6</sup> parasites were suspended in 100  $\mu$ L culture media and injected intracecally  
423 (6). Data analysis and graphing was performed with Graphpad Prism 8.0. Final figures were  
424 modified and arranged in Adobe Illustrator.

425

#### 426 **JMJD3 Blockade**

427 Mice were treated intraperitoneally with hybridoma grade DMSO in PBS (Sigma) or GSK-J4 in  
428 DMSO/PBS (100 $\mu$ L, DMSO/PBS, 25 mg/kg, Cayman Chemical #12074) one day before and

429 during *C. scindens* colonization (once per week) but not during *E. histolytica* infection.

430 Experiments shown are representative of 2 experimental replicates.

431

### 432 **Flow cytometry of intestinal cells**

433 Minced intestinal tissue was digested in Liberase TL (0.17 mg/ml Roche) and DNase (0.5  
434 mg/ml, Sigma) for 45 min at 37°C and processed into a single cell suspension following washing  
435 with a buffer containing EDTA.  $1 \times 10^6$  cells per mouse were stained with antibodies from Bio  
436 Legend, CD11c-BV421, CD4-BV605, Ly6c-FitC, CD3e-PerCp CY 5.5, SIGLEC F-PE, Ly6G  
437 PE Cy7, CD11b-APC, CD8a AF700, CD45-APC Cy7. Flow cytometric analysis was performed  
438 on an LSR Fortessa (BD Biosciences) and data analyzed via FlowJo (Tree Star Inc.). All gates  
439 were set based on fluorescence minus one (FMO) controls. Further data analysis and graphing  
440 was performed with Graphpad Prism 7.0. Final figures were modified and arranged in Adobe  
441 Illustrator. Experiments shown are representative of 2-4 experimental replicates.

442

### 443 **Bone marrow flow cytometry and cell sorting**

444 Bone marrow cells were isolated from femur, fibia and tibia of mice by centrifugation in custom  
445 made microcentrifuge tubes composed of a 0.5ml microcentrifuge tube with a hole punched in  
446 the bottom nested inside a 1.5mL microcentrifuge tube (VWR). Bone marrow cells were stained  
447 with PerCP-Cy5.5-labeled lineage (Lin) markers (TCRb, CD3e, CD49b, B220Gr1, CD11c,  
448 CD11b), anti-CD34-Brilliant Violet 421, c-Kit-Brilliant Violet 605, CD127-PE-Cy7, FcγRII-III  
449 (CD16/CD42)-APC-Cy7, and Sca-1-APC, CD150 PE, Live dead staining with Zombie Aqua  
450 (Bioledgend) or 7AAD for sort experiments. Flow cytometric analysis was performed on an LSR  
451 Fortessa (BD Biosciences) or cells sorted on a Becton Dickinson Influx Cell Sorter into RNA

452 later (Qiagen) or Cryostore CS10 (Stemcell) with 7AAD as a live dead stain . Data analyzed via  
453 FlowJo (Tree Star Inc.). All gates were set based on fluorescence minus one (FMO) controls.  
454 Common Lymphoid Progenitors (CLP) are Lin-IL-7R+c-Kit<sup>int</sup>Sca-1<sup>int</sup>, Common Myeloid  
455 Progenitors (CMP) are Lin-c-Kit+Sca-1-CD34+FcγRII-III<sup>int</sup>; Granulocyte-Monocyte-Progenitors  
456 (GMP) are Lin-c-Kit+Sca-1-CD34+FcγRII-III<sup>hi</sup>; Megakaryocyte-Erythroid Progenitors (MEP)  
457 are Lin-c-Kit+Sca-1-CD34-FcγRII-III-. Experiments shown are representative of 2-4  
458 experimental replicates.

459

#### 460 **ChIP-qPCR**

461 For ChIP-QPCR experiments approximately 6,000 GMPs from *C. scindens* colonized or control  
462 mice (CBA/J) were sorted on an Influx cell sorter into Cryostore CS10 (Stemcell) as above. The  
463 samples were thawed then subjected to chromatin isolation, chromatin shearing, DNA isolation,  
464 and ChIP. ChIP-qPCR and data analysis was then performed. *Chromatin Isolation:* Chromatin  
465 was isolated using the ChromaFlash Chromatin Extraction Kit (EpiGentek, Cat. #P-2001).  
466 *Chromatin Fragmentation:* Chromatin was sheared using the EpiSonic 2000 Sonication System  
467 (EpiGentek, Cat. #EQC-2000) based on the standard operation protocol for small amounts of  
468 cells. Chromatin was sonicated for 20 cycles with 45” On and 15” Off. *Chromatin*  
469 *Quantification:* Total volume of chromatin solution was 60 µl for each sample. The sheared  
470 chromatin concentration was measured by fluorescence quantification of chromatin associated  
471 DNA. *DNA Purification:* DNA was purified using 5 µl of sheared chromatin as input. DNA was  
472 eluted with 15 µl of water. 1 µl of purified DNA was used for fluorescence quantification.  
473 *Antibody validation:* The anti-H3K4me3 (Epigentek Cat. #A-4033), anti-H3K27me3 (Epigentek  
474 Cat. #A-4039) antibodies were validated using the Pre-Sure ChIP Antibody Validation Kit  
475 (EpiGentek, Cat. #P-2031). The ChIP-Grade Intensity (CGI) is 4.0 for H3K4me3, and 4.2 for

476 H3K27me3, respectively. *Chromatin Immunoprecipitation:* Because of small amount of  
477 chromatin for each sample, the ChIP reaction was based on the high sensitivity ChIP protocol  
478 modified from P-2027 kit. 50 ng of sheared chromatin samples in 200  $\mu$ l ChIP assay buffer were  
479 added into the wells coated with 0.5  $\mu$ g of anti-H3K4me3 or anti-H3K27me3, respectively. 2  $\mu$ g  
480 of Jurkat cell chromatin was used as a positive control. The samples were incubated at room  
481 temperature for 180 minutes with continuous shaking (100 rpm). After incubation, the wells  
482 were washed and the chromatin immunoprecipitated DNA was purified and eluted in 14  $\mu$ l of  
483 water. *qPCR:* was performed in duplicate using 1  $\mu$ l of DNA and gene-specific primers designed  
484 for the target gene region for 60 cycles. Un-ChIPed DNA (10%) was used as input for  
485 determining enrichment efficiency (Input%). Primer sequences based on the targeted CEBPA  
486 and CEBPB region sequences are listed below/ CEBPA-1: CEBPA-TSS; CEBPA-2: CEBPA-  
487 promoter; CEBPB-1: CEBPB-TSS; CEBPB-2: CEBPB-promoter

| <b>Primer sequences Binding site</b> | <b>Forward</b>                      | <b>Reverse</b>                    |
|--------------------------------------|-------------------------------------|-----------------------------------|
| CEBPA-1                              | 5'-<br>TGCCGGGAGAACTCTA<br>ACT-3'   | 5'-<br>TCTGGAGGTGACTGCTC<br>AT-3' |
| CEBPA-2                              | 5'-<br>CGATCTCTCTCCACTAG<br>CACT-3' | 5'-<br>CGCTTTTATAGAGGGTC<br>GG-3' |
| CEBPB-1                              | 5'-<br>CCTTATAAACCTCCCGC<br>TC-3'   | 5'-<br>CTCCATGGGTCTAAAG<br>GC-3'  |
| CEBPB-2                              | 5'-                                 | 5'- T C G G                       |

GTAGCTGGAGGAACGA GAACACGGAGGAG-3'  
TCTG-3'

488

489 **Colony forming assay for determination of bone marrow hematopoietic precursors**

490

491 Bone marrow cells were isolated (33) and then cultured in methylcellulose-based medium that  
492 included, 3 units/mL Epo, 10 ng/mL mouse recombinant IL-3, 10 ng/mL human recombinant IL-  
493 6, and 50 ng/mL mouse recombinant stem-cell factor per manufacturer procedures (M3434;  
494 StemCell Technologies, Vancouver, BC). Colony formation of burst-forming unit–erythroid  
495 (BFU-Es), colony-forming unit–granulocyte/monocyte (CFU-GMs), and CFU  
496 granulocyte/erythrocyte/monocyte/macrophage (CFU-GEMMs) were analyzed after 7 days.  
497 Experiments shown are representative of 2 experimental replicates.

498

499 **RNA sequencing and data analysis**

500 GMPs were isolated from six control and six *C. scindens*-treated mice as described above. RNA  
501 was isolated from approximately 7,000 sorted GMPs per mouse utilizing the Qiagen RNeasy  
502 Micro Kit. Ribosomal RNA depletion was performed using the NEBNext® rRNA Depletion Kit  
503 (Human/Mouse/Rat) and alternate protocol for low yield RNA. Directional cDNA libraries were  
504 generated the NEBNext® Ultra™ Directional RNA Library Prep Kit for Illumina®, including 15  
505 PCR cycles of amplification. Multiplexed samples were sequenced (75 bp paired-end reads)  
506 using the NextSeq 500 platform. For sequencing, libraries were sequenced with the NGS  
507 NextSeq kit - 150 cycle High Output Kit, paired end 75x75 bp read. Data analysis was performed  
508 first by the UVA Bioinformatics Core. Reads were mapped to the mouse transcriptome  
509 (GRCm38) using Salmon and gene level abundances quantified using tximport. Differential gene  
510 expression analysis was then performed in R using DESeq2(34), which yielded no differentially

511 expressed genes with FDR-corrected p-values < 0.05. In a second round of analysis, RNA-seq  
512 data were analyzed by aligning the raw reads to the mouse mm10 version of the genome using  
513 HISAT2(35) (v2.0.4) and transcripts were assembled and quantified using StringTie  
514 (v1.3.4d)(36) and GENCODE vM19 annotations. Using this second approach, a small collection  
515 of 20-30 significantly affected genes were identified. ConsensusPathDB (37) was used to  
516 identify functional enrichment in the top 50% of genes ranked by unadjusted P value. RNA-seq  
517 data are available from the Gene Expression Omnibus (accession number GSE121503).

#### 518 **16S rRNA Gene Amplicon Sequencing (Mouse)**

519 DNA was isolated from mouse cecal lysate (QIAamp DNA Stool Mini Kit). The V4 region of  
520 the 16S rRNA gene was amplified from each sample using the dual indexing sequencing strategy  
521 as described previously(38). Sequencing performed on the Illumina MiSeq platform, using a  
522 MiSeq Reagent Kit V2 500 cycles (Illumina cat# MS102-2003), according to the manufacturer's  
523 instructions with modifications found in the Schloss SOP:

524 [https://github.com/SchlossLab/MiSeq\\_WetLab\\_SOP](https://github.com/SchlossLab/MiSeq_WetLab_SOP). The mock community produced  
525 ZymoBIOMICS Microbial Community DNA Standard (Zymo Research cat# D6306) was  
526 sequenced to monitor sequencing error. The overall error rate was 0.02% as determined using the  
527 software package mothur version 1.39.5 following the Illumina MiSeq standard operating  
528 procedure (39) .

#### 529 **16S rRNA Gene V4 region sequencing, sample selection and extraction (Human)**

530 Diarrheal and non-diarrheal reference stools were collected during scheduled study visits  
531 (scheduled visits took place at enrollment and at 6, 10, 12, 14, 17, 18, 39, 40, 52, 53,  
532 65, 78, 91, 104 weeks of age)(19). Samples were brought into the study clinic and stool was  
533 transported from the field to our laboratory at 4°C, aliquoted in DNase- and RNase-free



534 cryovials, and stored at -80°C on the day of collection. 200ug was removed for total nucleic acid  
535 extraction. Positive extraction controls were achieved by spiking phocine herpesvirus (Erasmus  
536 MC, Department of Virology, Rotterdam, The Netherlands) and bacteriophage MS2 (ATCC  
537 15597B; American Type Culture Collection, Manassas, VA) into each sample during the  
538 extraction process. The fecal DNA was then tested for *E. histolytica* by use of a multiplex qPCR  
539 assay to detect parasitic protozoans as described by Haque et al (38). DNA Samples positive for  
540 *E. histolytica* and non-diarrheal reference samples were shipped to our laboratory at UVA for  
541 library construction.

#### 542 **Library construction for next-generation sequencing (Human)**

543 The entire 255bp V4 region of the 16 S rDNA gene was amplified as previously described(40),  
544 using phased Illumina-eubacteria primers to amplify the V4 16 S rDNA region (515F – 806R)  
545 and to add the adaptors necessary for illumina sequencing and the GOLAY index necessary for  
546 de-multiplexing after parallel sequencing. Negative controls included the addition of extraction  
547 blanks that were tested throughout the amplification and sequencing process to ensure they  
548 remained negative. As a positive PCR control, DNA extracted from the HM-782D Mock  
549 Bacteria Community (ATCC through BEI Resources) was run on each plate and added to the  
550 library. The library was then sent to UVA Biomolecular core facility. A PhiX DNA library was  
551 spiked into the 16S sequencing run (20%) to increase genetic diversity prior to parallel  
552 sequencing in both forward and reverse directions using the Miseq V3 kit and machine (per  
553 manufacturer's protocol).

554

#### 555 **16S rRNA Gene Amplicon Curation and Analysis**

556 All 16S data curation and analysis was performed using R version 3.5.1. Sequences were curated  
557 using the R package DADA2 version 1.10.1, following the DADA2 pipeline tutorial v1.8 (41) .

558 Briefly, reads were filtered and trimmed using standard parameters outlined in the DADA2v1.8  
559 pipeline. The error rates for the murine or human amplicon datasets were determined using the  
560 DADA2's implementation of a parametric error model. Samples were then dereplicated and  
561 sequence and variants were inferred. For the 16S data from murine samples, overlapping  
562 forward and reverse reads were merged and sequences that were shorter than 250bp or longer  
563 than 254bp were removed. For the 16S data from human samples, only forward reads were used.  
564 Finally, chimeras were removed. Taxonomy was assigned to amplicon sequence variants (ASVs)  
565 using the DADA2- formatted SILVA taxonomic training data release 132 (42). A partial  
566 sequence from [*Lachnoclostridium*] *scindens* ATCC 35704 (NCBI Reference Sequence:  
567 NR\_028785.1) was added to the Silva training data v132 to attempt to identify *Clostridium*  
568 *scindens* ASVs. Following sequence curation, the packages phyloseq v1.26.1(43), vegan, dplyer  
569 and ggplot2 were used for analysis and generation of figures. This includes determining the axes  
570 for the PCoA plots of Bray-Curtis dissimilarities (beta-diversity) calculated from rarified  
571 sequence abundance. Additionally, the package vegan was used to determine significant  
572 differences between groups with PERMANOVA. The sequences associated with analysis of the  
573 murine data were deposited to the SRA under the PRJNA503904. The sequences associated with  
574 analysis of the human data will be deposited to the SRA and linked via the dbGaP accession  
575 number phs001478.v1.p1. Full details of the design of the human cohort study have been  
576 described (19) and all studies were approved by the Ethical Review Committee of the ICDDR, B  
577 and the Institutional Review Boards of the Universities of Virginia and informed consent was  
578 obtained after the nature and possible consequences of the studies were explained in all cohort  
579 studies. Final figures were modified and arranged in Adobe Illustrator CC.

580 ***C. scindens* culture, marrow and cecal lysate qPCR**

581 Purity of *C. scindens* culture was confirmed via qPCR and Sanger sequencing with broad  
582 specificity eubacteria primers, EUB forward 5'-ACTCCTACGGGAGGCAGCAGT-3'EUB  
583 reverse 5'-ATTACCGCGGCTGCTGGC-3', and *C. scindens* baiCD stereo-specific  
584 7alpha/7beta-hydroxy-3-oxo-delta4-cholenoic acid oxidoreductase primers, BaiCD F - 5'-  
585 CAGCCRCAGATGTTCTTTG-3' BaiCD R - 5'-GCATGGAATTCHACTGCRTC-3' *C.*  
586 *scindens* colonization was measured via qPCR from cecal lysate (QIAamp DNA Stool Mini  
587 Kit). qPCR for baiCD with SYBR green was performed and data were normalized to expression  
588 of a conserved *Eubacteria* 16s RNA gene (EUB) (44). Primer concentrations, annealing  
589 temperatures, and cycle number were optimized for each primer pair. For each primer pair, a  
590 dilution curve of a positive cDNA sample was included to enable calculation of the efficiency of  
591 the amplification. The relative message levels of each target gene were then normalized to EUB  
592 or the mouse housekeeping gene S14 using a method described and utilized previously (12, 13,  
593 45). Data is presented as relative expression. For sorted marrow qPCR, RNA was isolated from  
594 approximately 7,000 sorted GMPs utilizing the Qiagen RNeasy Micro Kit. S14 forward 5'-  
595 TGGTGTCTGCCACATCTTTGCATC-3', S14 reverse 5'-  
596 AGTCACTCGGCAGATGGTTTCCTT-3', Jmjd3 forward 5'-CTCTGGAACTTTCATGCCGG-  
597 3' Jmjd3 reverse, 5'-CTTAGCCCCATAGTTCCGTTTG-3', CebpA forward 5'-  
598 CAAAGCCAAGAAGTCGGTGGACAA, CebpA reverse 5' -  
599 TCATTGTGACTGGTCAACTCCAGC  
600 CebpE forward 5'-TGTGGGCACCAGACCCTAAG, CebpE reverse 5'-  
601 GCTGCCATTGTCCACGATCT, CebpD forward 5'- CTTTTAGGTGGTTGCCGAAG, CebpD  
602 reverse 5' GCAACGAGGAATCAAGTTTCA, Kdm4dl forward 5'-

603 CATGGTCACCTTTCCCTATGG, Kdm4dl reverse 5'-AAAATTGATGGCCTCTGCG. Primers  
604 were purchased from Integrated DNA Technologies Coralville, Iowa, USA.

605

### 606 **Serum deoxycholate ELISA**

607 Serum Deoxycholate was measured via ELISA (Cloud-Clone Corp. CES089Ge) in 80 children  
608 each from two birth cohorts in Mirpur Dhaka, Bangladesh. Full details of the design of these two  
609 birth cohort studies, including socioeconomic status data, have been described (19, 46) and all  
610 studies were approved by the Ethical Review Committee of the ICDDR, B and the Institutional  
611 Review Boards of the Universities of Virginia and informed consent was obtained after the  
612 nature and possible consequences of the studies were explained in all cohort studies. Children  
613 were approximately two years of age and serum was selected by identifying diarrheal stools  
614 within 6 months of the blood draw that were *E. histolytica* positive (n=40) and negative (n=40)  
615 as identified via qPCR in both cohorts (47). Association of serum DCA with intestinal *E.*  
616 *histolytica* infection was evaluated in a logistic regression, adjusting for HAZ at enrollment,  
617 monthly family expenditure, and mother's education. The regression was performed with and  
618 without consideration of fecal calprotectin. Improvement of model fit with addition of  
619 calprotectin was evaluated by log-likelihood ratio test. The model with fecal calprotectin showed  
620 a slightly improved model fit, in which c-statistic of 0.896 indicated near excellent predictive  
621 power for intestinal EH infection. Serum was measured in 6 mice from each of at least two  
622 experiments that were gavaged with *C. scindens* or media control as described utilizing the same  
623 kit or in DCA treated mice. For both children and mice 25uL of serum was utilized at a 1:2  
624 (humans) or 1:4 (mice) dilution following kit protocol with a 10 minute development step  
625 following administration of substrate solution. The logistic regression analyses were performed

626 using the function “glm” in R software version 3.5.2 (r-project.org), while model fitting and  
627 predictability were evaluated using the R packages “lmtree” and “pROC” respectively.

### 628 **Targeted profiling of serum bile acids using UPLC-MS**

629 In specific pathogen free mice, Plasma bile acids were quantified as previously described (48) by  
630 ACQUITY ultraperformance liquid chromatography (UPLC) (Waters, Ltd., Elstree, UK).

631 Briefly, 100 µl of plasma were spiked with isotopically labeled bile acid standards followed by  
632 the addition of 300 µl of ice-cold methanol to facilitate protein precipitation. Bile acids were  
633 separated over a 15-minute gradient on an ACQUITY BEH C8 column (1.7 µm, 100 mm x 2.1  
634 mm), detected by a Xevo TQ-S mass spectrometer (Waters, Manchester, UK) operating in the  
635 negative ionization mode (ESI-) and assayed using multiple reaction monitoring (MRM).

636 In gnotobiotic mice Plasma bile acids were measured using the Biocrates Bile Acids kit  
637 (Biocrates Life Sciences AG, Innsbruck, Austria), which detects 20 bile acids. Briefly, 10ml of  
638 murine plasma samples was added to filter plates and samples were processed according to  
639 manufacturer’s protocol. All reagents used during sample preparation were UHPLC-MS grade.  
640 Samples were analyzed by LC-MS/MS on a Waters (Milford, MA) I-Class Acquity  
641 chromatography system in-line with a Waters TQ-S mass spectrometer. Compounds were  
642 analyzed using TargetLynx XS software with the results subsequently imported into MetIDQ  
643 software (Biocrates) for quality control (QC) validation. Raw metabolite concentrations (mM)  
644 were normalized using identical QC samples across the plate to control for variation over the  
645 course of the run. QC samples were proprietary samples spiked with metabolites measured  
646 during targeted metabolomics. Normalized metabolite concentrations were exported for further  
647 analysis and screened for inclusion in the data set based on two criteria. First, metabolites must  
648 be within the valid range in at least 66% of quality control samples run on a plate to be included

649 in analysis. Second, metabolites must be above the limit of detection in at least 60% of all  
650 measurements to be included in the valid data set. Data set validation was performed using R  
651 software version 3.4.3 (r-project.org)

## 652 **References**

- 653 1. C. A. Gilchrist *et al.*, Role of the Gut Microbiota of Children in Diarrhea Due to the  
654 Protozoan Parasite *Entamoeba histolytica*. *J. Infect. Dis.* **213**, jiv772- (2015).
- 655 2. S. L. Burgess, C. A. Gilchrist, T. C. Lynn, W. A. Petri, *Infect. Immun.*, in press,  
656 doi:10.1128/IAI.00101-17.
- 657 3. A. Khosravi *et al.*, “Gut Microbiota Promote Hematopoiesis to Control Bacterial  
658 Infection” (Elsevier, 2014), , doi:10.1016/j.chom.2014.02.006.
- 659 4. C. G. Buffie, E. G. Pamer, Microbiota-mediated colonization resistance against intestinal  
660 pathogens. *Nat. Rev. Immunol.* **13**, 790–801 (2013).
- 661 5. S. Saeed *et al.*, Epigenetic programming of monocyte-to-macrophage differentiation and  
662 trained innate immunity. *Science (80-. )*. **345**, 1251086–1251086 (2014).
- 663 6. J. W. M. van der Meer, L. A. B. Joosten, N. Riksen, M. G. Netea, Trained immunity: A  
664 smart way to enhance innate immune defence. *Mol. Immunol.* **68**, 40–44 (2015).
- 665 7. Q. Yan *et al.*, Jmjd3-mediated epigenetic regulation of inflammatory cytokine gene  
666 expression in serum amyloid A-stimulated macrophages. *Cell. Signal.* **26**, 1783–1791  
667 (2014).
- 668 8. A. Christ *et al.*, Western Diet Triggers NLRP3-Dependent Innate Immune  
669 Reprogramming. *Cell.* **172**, 162-175.e14 (2018).
- 670 9. E. Niemitz, Jmjd3, PHF20 and reprogramming. *Nat. Genet.* **45**, 477–477 (2013).
- 671 10. A. Salminen, K. Kaarniranta, M. Hiltunen, A. Kauppinen, Histone demethylase Jumonji  
672 D3 (JMJD3/KDM6B) at the nexus of epigenetic regulation of inflammation and the aging  
673 process. *J. Mol. Med. (Berl)*. **92**, 1035–43 (2014).
- 674 11. F. De Santa *et al.*, Jmjd3 contributes to the control of gene expression in LPS-activated  
675 macrophages. *EMBO J.* **28**, 3341–52 (2009).
- 676 12. S. L. Burgess *et al.*, *Infect. Immun.*, in press, doi:10.1128/IAI.00316-16.
- 677 13. S. L. Burgess *et al.*, Bone Marrow Dendritic Cells from Mice with an Altered Microbiota  
678 Provide Interleukin 17A-Dependent Protection against *Entamoeba histolytica* Colitis.  
679 *MBio.* **5**, e01817-14- (2014).
- 680 14. C. Naylor *et al.*, Leptin Receptor Mutation Results in Defective Neutrophil Recruitment to  
681 the Colon during *Entamoeba histolytica* Infection. *MBio.* **5**, e02046-14 (2014).

- 682 15. A. Asgharpour, C. Gilchrist, D. Baba, S. Hamano, E. Houpt, Resistance to intestinal  
683 *Entamoeba histolytica* infection is conferred by innate immunity and Gr-1+ cells. *Infect.*  
684 *Immun.* **73**, 4522–9 (2005).
- 685 16. K. Watanabe *et al.*, Microbiome-mediated neutrophil recruitment via CXCR2 and  
686 protection from amebic colitis. *PLOS Pathog.* **13**, e1006513 (2017).
- 687 17. S. L. Burgess, W. A. Petri, Jr, The Intestinal Bacterial Microbiome and *E. histolytica*  
688 Infection. *Curr. Trop. Med. reports.* **3**, 71–74 (2016).
- 689 18. M. G. Netea *et al.*, Trained immunity: A program of innate immune memory in health and  
690 disease. *Science (80-. ).* **352**, aaf1098–aaf1098 (2016).
- 691 19. B. D. Kirkpatrick *et al.*, The “Performance of Rotavirus and Oral Polio Vaccines in  
692 Developing Countries” (PROVIDE) Study: Description of Methods of an Interventional  
693 Study Designed to Explore Complex Biologic Problems. *Am. J. Trop. Med. Hyg.* **92**, 744–  
694 51 (2015).
- 695 20. J. A. Winston, C. M. Theriot, Impact of microbial derived secondary bile acids on  
696 colonization resistance against *Clostridium difficile* in the gastrointestinal tract. *Anaerobe.*  
697 **41**, 44–50 (2016).
- 698 21. J. M. Ridlon *et al.*, *Clostridium scindens*: a human gut microbe with a high potential to  
699 convert glucocorticoids into androgens. *J. Lipid Res.* **54**, 2437–49 (2013).
- 700 22. S. Bhowmik *et al.*, Structural and functional characterization of BaiA, an enzyme involved  
701 in secondary bile acid synthesis in human gut microbe. *Proteins.* **82**, 216–29 (2014).
- 702 23. E. R. Houpt *et al.*, The mouse model of amebic colitis reveals mouse strain susceptibility  
703 to infection and exacerbation of disease by CD4+ T cells. *J. Immunol.* **169**, 4496–503  
704 (2002).
- 705 24. C. M. Schürch, C. Riether, A. F. Ochsenbein, Cytotoxic CD8+ T Cells Stimulate  
706 Hematopoietic Progenitors by Promoting Cytokine Release from Bone Marrow  
707 Mesenchymal Stromal Cells. *Cell Stem Cell.* **14**, 460–472 (2014).
- 708 25. K. Atarashi *et al.*, Induction of colonic regulatory T cells by indigenous *Clostridium*  
709 species. *Science (80-. ).* **331**, 337–341 (2011).
- 710 26. H. S. Radomska *et al.*, CCAAT/enhancer binding protein alpha is a regulatory switch  
711 sufficient for induction of granulocytic development from bipotential myeloid progenitors.  
712 *Mol. Cell. Biol.* **18**, 4301–14 (1998).
- 713 27. R. Avellino, R. Delwel, Expression and regulation of C/EBP $\alpha$  in normal myelopoiesis and  
714 in malignant transformation. *Blood.* **129**, 2083–2091 (2017).
- 715 28. H. Hirai *et al.*, C/EBP $\beta$  is required for “emergency” granulopoiesis. *Nat. Immunol.* **7**,  
716 732–739 (2006).
- 717 29. G. N. MORRIS, J. WINTER, E. P. CATO, A. E. RITCHIE, V. D. BOKKENHEUSER,

- 718 Clostridium scindens sp. nov., a Human Intestinal Bacterium with Desmolytic Activity on  
719 Corticoids. *Int. J. Syst. Bacteriol.* **35**, 478–481 (1985).
- 720 30. C. Doñas *et al.*, The histone demethylase inhibitor GSK-J4 limits inflammation through  
721 the induction of a tolerogenic phenotype on DCs. *J. Autoimmun.* **75**, 105–117 (2016).
- 722 31. L. Kruidenier *et al.*, A selective jumonji H3K27 demethylase inhibitor modulates the  
723 proinflammatory macrophage response. *Nature.* **488**, 404–8 (2012).
- 724 32. S.-H. Yu *et al.*, JMJD3 facilitates C/EBP $\beta$ -centered transcriptional program to exert  
725 oncorepressor activity in AML. *Nat. Commun.* **9**, 3369 (2018).
- 726 33. M. Swamydas, M. S. Lionakis, Isolation, purification and labeling of mouse bone marrow  
727 neutrophils for functional studies and adoptive transfer experiments. *J. Vis. Exp.*, e50586  
728 (2013).
- 729 34. M. I. Love, W. Huber, S. Anders, Moderated estimation of fold change and dispersion for  
730 RNA-seq data with DESeq2. *Genome Biol.* **15**, 550 (2014).
- 731 35. D. Kim, B. Langmead, S. L. Salzberg, HISAT: a fast spliced aligner with low memory  
732 requirements. *Nat. Methods.* **12**, 357–360 (2015).
- 733 36. M. Pertea *et al.*, StringTie enables improved reconstruction of a transcriptome from RNA-  
734 seq reads. *Nat. Biotechnol.* **33**, 290–5 (2015).
- 735 37. R. Herwig, C. Hardt, M. Lienhard, A. Kamburov, Analyzing and interpreting genome data  
736 at the network level with ConsensusPathDB. *Nat. Protoc.* **11**, 1889–1907 (2016).
- 737 38. J. J. Kozich, S. L. Westcott, N. T. Baxter, S. K. Highlander, P. D. Schloss, Development  
738 of a dual-index sequencing strategy and curation pipeline for analyzing amplicon  
739 sequence data on the MiSeq Illumina sequencing platform. *Appl. Environ. Microbiol.* **79**,  
740 5112–20 (2013).
- 741 39. P. D. Schloss *et al.*, Introducing mothur: open-source, platform-independent, community-  
742 supported software for describing and comparing microbial communities. *Appl. Environ.*  
743 *Microbiol.* **75**, 7537–41 (2009).
- 744 40. J. G. Caporaso *et al.*, Ultra-high-throughput microbial community analysis on the Illumina  
745 HiSeq and MiSeq platforms. *ISME J.* **6**, 1621–4 (2012).
- 746 41. B. J. Callahan *et al.*, DADA2: High-resolution sample inference from Illumina amplicon  
747 data. *Nat. Methods.* **13**, 581–583 (2016).
- 748 42. E. Pruesse *et al.*, SILVA: a comprehensive online resource for quality checked and  
749 aligned ribosomal RNA sequence data compatible with ARB. *Nucleic Acids Res.* **35**,  
750 7188–7196 (2007).
- 751 43. P. J. McMurdie, S. Holmes, phyloseq: An R Package for Reproducible Interactive  
752 Analysis and Graphics of Microbiome Census Data. *PLoS One.* **8**, e61217 (2013).
- 753 44. P. S. Hoffman *et al.*, Preclinical Studies of Amoxicilicil: A Systemic Therapeutic Developed



- 754 for Treatment of *Clostridium difficile* Infections also shows Efficacy against *Helicobacter*  
755 *pylori*. *Antimicrob. Agents Chemother.* (2014), doi:10.1128/AAC.03112-14.
- 756 45. P. Y. Muller, H. Janovjak, A. R. Miserez, Z. Dobbie, Processing of gene expression data  
757 generated by quantitative real-time RT-PCR. *Biotechniques*. **32**, 1372–4, 1376, 1378–9  
758 (2002).
- 759 46. D. Mondal *et al.*, Contribution of enteric infection, altered intestinal barrier function, and  
760 maternal malnutrition to infant malnutrition in Bangladesh. *Clin. Infect. Dis.* **54**, 185–92  
761 (2012).
- 762 47. S. Roy *et al.*, Real-time-PCR assay for diagnosis of *Entamoeba histolytica* infection. *J.*  
763 *Clin. Microbiol.* **43**, 2168–72 (2005).
- 764 48. M. H. Sarafian *et al.*, Bile Acid Profiling and Quantification in Biofluids Using Ultra-  
765 Performance Liquid Chromatography Tandem Mass Spectrometry. *Anal. Chem.* **87**, 9662–  
766 9670 (2015).
- 767
- 768
- 769
- 770
- 771
